# Supplementary material for: All-Trans Retinoic Acid Improves the Effects of Bone Marrow-Derived Mesenchymal Stem Cells on the Treatment of Ankylosing Spondylitis: AnIn VitroStudy
Source: Hindawi journal article supplement (doi:10.1155/2015/484528), 2015-01-01
Supplement: f1 [file 484528.f1.pdf]

## Supplementary Figure and Legend

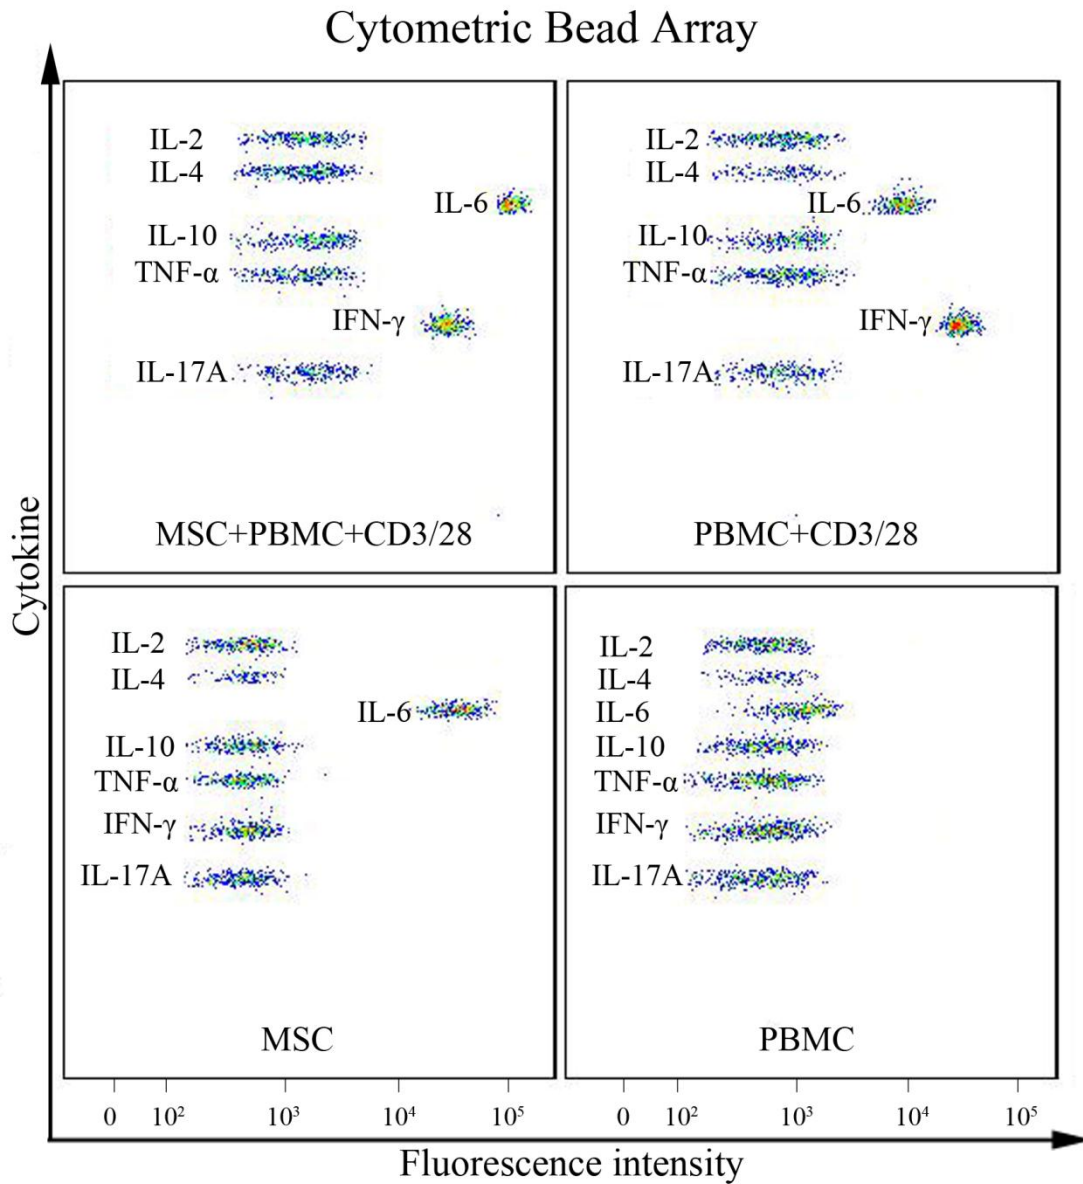

SUPPLYMENTARY FIGURE 1. Cytokine secretion measured by CBA under different circumstances.

MSCs secreted only IL-6 but not other cytokines. In the co-culture of MSCs and PBMCs, the production of IL-6 and IFN- $\gamma$  was significantly high, especially IL-6. These seven bands stood for seven different cytokines within the CBA detecting spectrum. The fluorescence intensities were positively related to cytokine concentrations.
